# Supplementary material for: Novel Symmetrical Cage Compounds as Inhibitors of the Symmetrical MRP4-Efflux Pump for Anticancer Therapy
Source: MDPI journal article supplement (doi:10.3390/ijms22105098), 2021-05-12

# Novel symmetrical cage compounds as inhibitors of the symmetrical MRP4-efflux pump for anticancer therapy

David Kreutzer <sup>1</sup>, Henry Döhring <sup>1</sup>, Peter Werner <sup>1</sup>, Christoph Ritter <sup>2</sup> and Andreas Hilgeroth <sup>1,\*</sup>

<sup>1</sup> Institute of Pharmacy, Research Group of Drug Development, Martin Luther University Halle-Wittenberg; andreas.hilgeroth@pharmazie.uni-halle.de

<sup>2</sup> Institute of Pharmacy, Department of Clinical Pharmacy, Ernst Moritz Arndt University Greifswald; ritter@uni-greifswald.de

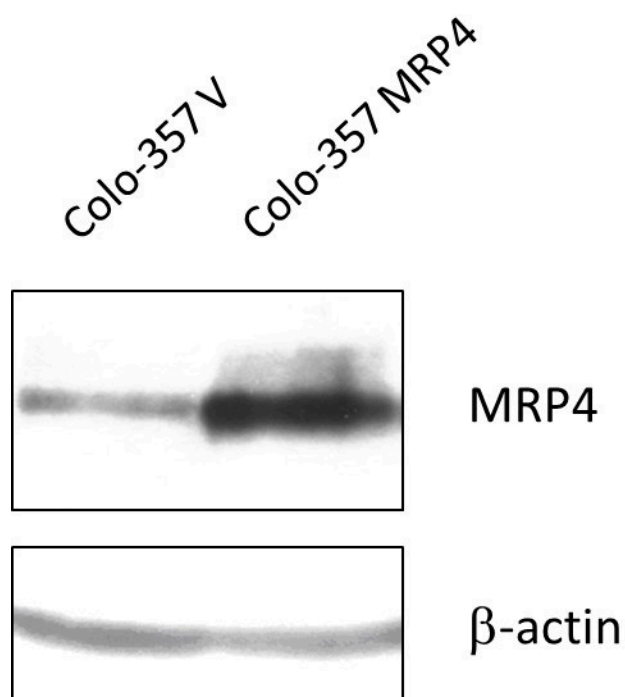

Supplement: s1 [file s1]
